# Supplementary material for: Stethoscope disinfection is rarely done in Ethiopia: What are the associated factors?
Source: PubMed Central journal article supplement (PMC6597050; doi:10.1371/journal.pone.0208365), 2019-06-27
Supplement: pone.0208365.s001.pdf [file pone.0208365.s001.pdf]

**ክፍል አንድ:- ማህበራዊና ዲሞክራሲክ መረጃ**

| <b>ክፍልአንድ:- ማህበራዊና ዲሞክራሲክ መረጃ</b> |                         |                                                            |    |              |
|-----------------------------------|-------------------------|------------------------------------------------------------|----|--------------|
| ተ.ቁ                               | መጠይቅ                    | ምላሽ                                                        | ከፊ | Skip pattern |
| 101                               | የሚሰሩበት የጤና ተቋም ደረጃ      | <input type="checkbox"/> ሪፈራል ሆስፒታል                        | 1  |              |
|                                   |                         | <input type="checkbox"/> ዞናል(አጠቃላይ) ሆስፒታል                  | 2  |              |
|                                   |                         | <input type="checkbox"/> ጤና ጣቢያ                            | 3  |              |
| 102                               | በአሁኑ ጊዜ የሚሰሩበት ክፍል      | <input type="checkbox"/> OPD, E-OPD, Triage                | 1  |              |
|                                   |                         | <input type="checkbox"/> የተመላላሽታካሚዎችክሊኒክ (IPD)             | 2  |              |
|                                   |                         | <input type="checkbox"/> የሜዲካል ክፍል እና ሰርጂካል ክፍል            | 3  |              |
|                                   |                         | <input type="checkbox"/> የህፃናት ክፍል                         | 4  |              |
|                                   |                         | <input type="checkbox"/> ማዋለጃ ክፍል, Maternity እና Obstetrics | 5  |              |
|                                   |                         | <input type="checkbox"/> ቀዶ ጥገና ክፍል(OR) እና ማይነር (Minor-OR) | 6  |              |
|                                   |                         | <input type="checkbox"/> ላብራቶሪ                             | 7  |              |
|                                   |                         | <input type="checkbox"/> ሌላ (ይጠቀስ)                         | 8  |              |
| 103                               | ፆታ (አትጠይቅ)              | <input type="checkbox"/> ወንድ                               | 1  |              |
|                                   |                         | <input type="checkbox"/> ሴት                                | 2  |              |
| 104                               | ሞያ                      | <input type="checkbox"/> ሀኪም                               | 1  |              |
|                                   |                         | <input type="checkbox"/> ነርስ እና አዋላጅ ነርስ                   | 2  |              |
|                                   |                         | <input type="checkbox"/> ጤና መኮንን                           | 3  |              |
|                                   |                         | <input type="checkbox"/> ላብራቶሪ ቴክኒሻን                       | 4  |              |
|                                   |                         | <input type="checkbox"/> ሌላ (ይጠቀስ)                         | 5  |              |
| 105                               | የትምህርትደረጃ               | <input type="checkbox"/> ዲፕሎማ                              | 1  |              |
|                                   |                         | <input type="checkbox"/> የመጀመሪያ ዲግሪ                        | 2  |              |
|                                   |                         | <input type="checkbox"/> ሁለተኛ ዲግሪ እና ከዛ በላይ                | 3  |              |
| 106                               | እድሜ                     | ( )                                                        |    |              |
| 107                               | የስራ ዘመን ከመጨረሻ ምርቃቶች በኋላ | ( )                                                        |    |              |
| 108                               | የጋብቻ ሁኔታ                | <input type="checkbox"/> ያላገባ                              | 1  |              |
|                                   |                         | <input type="checkbox"/> ባለትዳር                             | 2  |              |
|                                   |                         | <input type="checkbox"/> የተፋታ (የተለያዩ)                      | 3  |              |
|                                   |                         | <input type="checkbox"/> መበለት                              | 4  |              |

**ክፍል አንድ: 1.2 አጠቃላይ መረጃ የጤና ባለሙያዎችን ኢንፎክሽን ፕሪቨንሽን እና እስታንዳርድ ፕሪኮኦሽን**

| <b>ክፍልአንድ:- 1.2 Infection Prevention&amp;Standard Precautions በተመለከተ አጠቃላይ መረጃ</b> |                                       |                             |    |  |
|------------------------------------------------------------------------------------|---------------------------------------|-----------------------------|----|--|
| ተ.ቁ                                                                                | መጠይቅ                                  | ምላሽ                         | ከፊ |  |
| 109                                                                                | በስራ ሂደት ስለ IP ወይም SP በተመለከተ ስልጠና ወስደው | <input type="checkbox"/> አዎ | 1  |  |

|     |                                                                     |        |   |  |
|-----|---------------------------------------------------------------------|--------|---|--|
|     | ያውቃሉ?                                                               | [ ] አይ | 2 |  |
| 113 | ስለኢትዮጵያ የinfection prevention and patient safety guideline መረጃ አሎት? | [ ] አዎ | 1 |  |
|     |                                                                     | [ ] አይ | 2 |  |
| 114 | በስራላይ ያለ የ IP ኮሚቴ በመስሪያ ቤቶች አለ?                                     | [ ] አዎ | 1 |  |
|     |                                                                     | [ ] አይ | 2 |  |
| 115 | ለምንደህልታካሚዎችን በቀን የህክምና አገልግሎቶችን ይሰጣሉ?                               | ( )    |   |  |
| 116 | በስራ ላይ ያለ SOP or Guideline or poster regarding IP መመሪያዎች አሉ?        | [ ] አዎ | 1 |  |
|     |                                                                     | [ ] አይ | 2 |  |

**ክፍል አንድ: 1.3:- የጤና ባለሙያዎች የእስቴቲስኮፕ የማከምን ልምድ (STETHOSCOPE DISINFECTION PRACTICE) በተመለከተ የቀረቡ መጠይቆች**

| ተ.ቁ   | መጠይቅ                                                           | ምላሽ    | ከ |  |
|-------|----------------------------------------------------------------|--------|---|--|
|       | <b>እስቴቲስኮፕ (Stethoscope) ማከምን በተመለከተ ያሉ መጠይቆች</b>              |        |   |  |
| 117   | እስቴቲስኮፕህን/ሽን ታካማለህ/ታካሚያለሽ (Do you disinfect your stethoscope?) |        |   |  |
| 117.1 | አዎ ..ከተገለገክኩበት በኋላ ወዲያውኑ                                       | [ ] አዎ | 1 |  |
|       |                                                                | [ ] አይ | 2 |  |
| 117.2 | አዎ..በሰውነት አንድና ከዛም በታች                                         | [ ] አዎ | 1 |  |
|       |                                                                | [ ] አይ | 2 |  |
| 117.3 | አዎ..በቀን አንድ እና ሁለት ጊዜ (One or two a day)                       | [ ] አዎ | 1 |  |
|       |                                                                | [ ] አይ | 2 |  |
| 117.4 | በፍፁም አላክምም                                                     | [ ] አይ |   |  |
| 118   | እስቴቲስኮፕ ለተለያዩ በሽታዎች (infections) ማስተላለፊያ ሊሆን እንደሚችል ታምናለህ      | [ ] አዎ | 1 |  |
|       |                                                                | [ ] አይ | 2 |  |

**ክፍል ሁለት:- የ Infection Prevention (IP) ክህሎትን የተመለከቱ ጥያቄዎች?**

|     | መጠይቅ                                                          | ምላሽ         | ከድ | Skip pattern |
|-----|---------------------------------------------------------------|-------------|----|--------------|
|     | <b>ከእጅ መታጠብ ጋር የተያያዘ መጠይቅ</b>                                 |             |    |              |
| 201 | ስራ ከመጀመሪያ በፊትና በኋላ እጅዎን በሰውናና በውሀ ይታጠባሉ?                      | [ ] ሁልጊዜ    | 2  |              |
|     |                                                               | [ ] አንዳንድጊዜ | 1  |              |
|     |                                                               | [ ] በፋፁም    | 0  |              |
| 202 | ታካሚዎችን ከመንካትዎ (ከማከም) በፊትና በኋላ እጅን ይታጠባሉ?                      | [ ] ሁልጊዜ    | 2  |              |
|     |                                                               | [ ] አንዳንድጊዜ | 1  |              |
|     |                                                               | [ ] በፋፁም    | 0  |              |
| 203 | ድንገተኛ የሆነ የደም የሰውነት ፈሳሽና የተበከሉ እቃዎች በነካዎት ጊዜ እጅን በአፋጣኝ ይታጠባሉ? | [ ] ሁልጊዜ    | 2  |              |
|     |                                                               | [ ] አንዳንድጊዜ | 1  |              |
|     |                                                               | [ ] በፋፁም    | 0  |              |

|                                               |                                                                                      |                                  |   |  |
|-----------------------------------------------|--------------------------------------------------------------------------------------|----------------------------------|---|--|
| 204                                           | ንፁህ ዳንት ከማድረግ በፊትና ካወለቁ በኋላ እጅን ይታጠባሉ?                                               | <input type="checkbox"/> ሁልጊዜ    | 2 |  |
|                                               |                                                                                      | <input type="checkbox"/> አንዳንድጊዜ | 1 |  |
|                                               |                                                                                      | <input type="checkbox"/> በፋፁም    | 0 |  |
| <b>የግላሽ (ዳንት)አጠቃቀምን በተመለከተ</b>                |                                                                                      |                                  |   |  |
| 205                                           | የተለያዩ ታካሚዎችን ከመንካትም በፊት ዳንት ይቀይራሉ?                                                   | <input type="checkbox"/> ሁልጊዜ    | 2 |  |
|                                               |                                                                                      | <input type="checkbox"/> አንዳንድጊዜ | 1 |  |
|                                               |                                                                                      | <input type="checkbox"/> በፋፁም    | 0 |  |
| 206                                           | የተለያዩ የህክምና አገልግሎቶችን ለአንድ ታካሚ በሚሰጡበት ጊዜ ዳንት ይቀይራሉ?                                   | <input type="checkbox"/> ሁልጊዜ    | 2 |  |
|                                               |                                                                                      | <input type="checkbox"/> አንዳንድጊዜ | 1 |  |
|                                               |                                                                                      | <input type="checkbox"/> በፋፁም    | 0 |  |
| 207                                           | ጠንካራ ዳንት ያደርጋሉ የህክምና መገልገያ እቃዎችን በሚያፀዱበት በሚያጥቡበት እንዲሁም በሚያክሙበት ጊዜ?                   | <input type="checkbox"/> ሁልጊዜ    | 2 |  |
|                                               |                                                                                      | <input type="checkbox"/> አንዳንድጊዜ | 1 |  |
|                                               |                                                                                      | <input type="checkbox"/> በፋፁም    | 0 |  |
| <b>የማስክ አጠቃቀምን በተመለከተ</b>                     |                                                                                      |                                  |   |  |
| 208                                           | የፊት መከላከያ አልያም መሸፈኛ ያደርጋሉ የመፈንጠር (የመረጨት) አደጋ የሚያስከትልን ስራ በሚያከናውኑበት ጊዜ?               | <input type="checkbox"/> ሁልጊዜ    | 2 |  |
|                                               |                                                                                      | <input type="checkbox"/> አንዳንድጊዜ | 1 |  |
|                                               |                                                                                      | <input type="checkbox"/> በፋፁም    | 0 |  |
| 209                                           | የ TB ተጠቂ ወይም በሽታ የያዘቸው ሰዎች በሚቀርቡበት ጊዜ የአፍና የአፍንጫ መሸፈኛ ያደርጋሉ?                         | <input type="checkbox"/> ሁልጊዜ    | 2 |  |
|                                               |                                                                                      | <input type="checkbox"/> አንዳንድጊዜ | 1 |  |
|                                               |                                                                                      | <input type="checkbox"/> በፋፁም    | 0 |  |
| <b>የጋዎን አጠቃቀምን በተመለከተ</b>                     |                                                                                      |                                  |   |  |
| 210                                           | የመረጨት (የመፈንጠር) አደጋ በልብስና በአካሌ ላይ ሊያስከትል የሚችል ስራ በሚያከናውኑበት ጊዜ ሽርጥ ወይም ገዋን ይለብሳሉ?      | <input type="checkbox"/> ሁልጊዜ    | 2 |  |
|                                               |                                                                                      | <input type="checkbox"/> አንዳንድጊዜ | 1 |  |
|                                               |                                                                                      | <input type="checkbox"/> በፋፁም    | 0 |  |
| <b>ጎንጎል አጠቃቀምን በተመለከተ</b>                     |                                                                                      |                                  |   |  |
| 211                                           | መከላከያ መነፅር ያደርጋሉ በፊትን እና በአፍጫዎ ላይ የመረጨት አደጋ የሚያስከትል ስራ በሚያከናውኑበት ጊዜ?                 | <input type="checkbox"/> ሁልጊዜ    | 2 |  |
|                                               |                                                                                      | <input type="checkbox"/> አንዳንድጊዜ | 1 |  |
|                                               |                                                                                      | <input type="checkbox"/> በፋፁም    | 0 |  |
| <b>ፕኤፕ በተመለከተ</b>                             |                                                                                      |                                  |   |  |
| 212                                           | ድንገተኛ የመርፌመወጋት አደጋ አልያም አደገኛ የሰውነት ፈሰሰ አይን ወይም በአፎት ላይ ከተረጨ በኋላ PEP ለመጀመር አስባው ያውቃሉ? | <input type="checkbox"/> ሁልጊዜ    | 2 |  |
|                                               |                                                                                      | <input type="checkbox"/> አንዳንድጊዜ | 1 |  |
|                                               |                                                                                      | <input type="checkbox"/> በፋፁም    | 0 |  |
| 213                                           | መርፌን ከመክደን ከማጣመም እና ከመስበር ይቆጠባሉ?                                                     | <input type="checkbox"/> ሁልጊዜ    | 2 |  |
|                                               |                                                                                      | <input type="checkbox"/> አንዳንድጊዜ | 1 |  |
|                                               |                                                                                      | <input type="checkbox"/> በፋፁም    | 0 |  |
| <b>አደገኛ የህክምና ነክ ቆሻሻዎችን አያያዝና አወገድ በተመለከተ</b> |                                                                                      |                                  |   |  |
| 214                                           | መርፌን ከተጠቀሙ በኋላ ወዲያው ከተገቢው ሴፍቲቦክስ ውስጥ ይጠቀሳሉ?                                          | <input type="checkbox"/> ሁልጊዜ    | 2 |  |
|                                               |                                                                                      | <input type="checkbox"/> አንዳንድጊዜ | 1 |  |
|                                               |                                                                                      | <input type="checkbox"/> በፋፁም    | 0 |  |
| 215                                           | የመርፌ መጣያ ሴፍቲቦክስ ለመጣል አመቺ በሆነ ርቀት ያስቀምጣሉ?                                             | <input type="checkbox"/> ሁልጊዜ    | 2 |  |
|                                               |                                                                                      | <input type="checkbox"/> አንዳንድጊዜ | 1 |  |
|                                               |                                                                                      | <input type="checkbox"/> በፋፁም    | 0 |  |
| 216                                           | ከህክምና አገልግሎት የሚወጡትን ቆሻሻዎች በተገቢው መንገድ በመነጣጠል ይጠቀሳሉ?                                   | <input type="checkbox"/> ሁልጊዜ    | 2 |  |
|                                               |                                                                                      | <input type="checkbox"/> አንዳንድጊዜ | 1 |  |

|     |                                                                                                      |              |   |  |
|-----|------------------------------------------------------------------------------------------------------|--------------|---|--|
|     |                                                                                                      | [ ] በፋፁም     | 0 |  |
|     | <b>ዳግመኛ በስራ ላይ የሚውሉ የህክምና መገልገያ እቃዎችን ማከም በተመለከተ</b>                                                 |              |   |  |
| 217 | የሰርጂካል መገልገያ እቃዎችን ከተጠቀሙ በሁለት ወይም ከሁለት በላይ የሚያውቁት ማከሚያውህ ድውስጥ ይጨምራሉ?                                 | [ ] ሁልጊዜ     | 2 |  |
|     |                                                                                                      | [ ] አንዳንድ ጊዜ | 1 |  |
|     |                                                                                                      | [ ] በፋፁም     | 0 |  |
| 218 | ሁሉንም የግል መከላከያ (PPE) ይለብሳሉ? የተበከሉ እቃዎችን በሚያጥቡና በሚያፀዱ በጽጌዜ                                            | [ ] ሁልጊዜ     | 2 |  |
|     |                                                                                                      | [ ] አንዳንድ ጊዜ | 1 |  |
|     |                                                                                                      | [ ] በፋፁም     | 0 |  |
| 219 | የተበከሉ እቃዎችን ከማፅዳት በፊት በማከሚያውህ ድውስጥ ይጨምራሉ?                                                            | [ ] ሁልጊዜ     | 2 |  |
|     |                                                                                                      | [ ] አንዳንድ ጊዜ | 1 |  |
|     |                                                                                                      | [ ] በፋፁም     | 0 |  |
|     | <b>የቲቢ በሽታን በተመለከተ</b>                                                                               |              |   |  |
| 220 | የሚስሉና እና የቲቢ በሽታ ተጠቁ ሊሆኑ ይችላሉ የምትለቸውን ሰዎች አፍና አፍንጫቸውን እንዲሸፍን ትነግራለህ/ሽ                                | [ ] ሁልጊዜ     | 2 |  |
|     |                                                                                                      | [ ] አንዳንድ ጊዜ | 1 |  |
|     |                                                                                                      | [ ] በፋፁም     | 0 |  |
|     |                                                                                                      | [ ] በፋፁም     | 0 |  |
| 221 | N-95 የአፍንጫ መሸፈኛ ማሳክ በማድረግ በ TB የተጠቁ ሰዎችን ያክማሉ?                                                       | [ ] ሁልጊዜ     | 2 |  |
|     |                                                                                                      | [ ] አንዳንድ ጊዜ | 1 |  |
|     |                                                                                                      | [ ] በፋፁም     | 0 |  |
|     | <b>የመርፌ አሰጣጥን በተመለከተ</b>                                                                             |              |   |  |
| 222 | መርፌ ለታካሚ ከመስጠት በፊት ትክክለኛውን መድሀኒት ትክክለኛውን መጠን በትክክለኛ ጊዜ በትክክለኛ መንገድና በትክክለኛ መንገድ መስጠትን አስቀድመው ያረጋግጣሉ? | [ ] ሁልጊዜ     | 2 |  |
|     |                                                                                                      | [ ] አንዳንድ ጊዜ | 1 |  |
|     |                                                                                                      | [ ] በፋፁም     | 0 |  |
| 223 | ከጀርም ነፃ የሆነ መርፌን ይጠቀማሉ? መድሀኒት ለታካሚዎች በሚሰጡበት ጊዜ                                                       | [ ] ሁልጊዜ     | 2 |  |
|     |                                                                                                      | [ ] አንዳንድ ጊዜ | 1 |  |
|     |                                                                                                      | [ ] በፋፁም     | 0 |  |
|     | <b>የ IP መርሆችን በተመለከተ</b>                                                                             |              |   |  |
| 224 | የ IP & SP መርሆችን በስራዎች ላይ ይታገብራሉ?                                                                     | [ ] ሁልጊዜ     | 2 |  |
|     |                                                                                                      | [ ] አንዳንድ ጊዜ | 1 |  |
|     |                                                                                                      | [ ] በፋፁም     | 0 |  |

**ክፍል ሦስት:- የጤና ባለሙያዎችን IP አመለካከት የተመለከተ መጠይቆች (ከቀረቡት ባለ 5 ነጥብ ምላሾች ውስጥ የእርሶን አመለካከት በትክክል የሚያንጸባርቀውን አንድ ምርጫ ይምረጡ)**

|     |                                                                    |                 |   |  |
|-----|--------------------------------------------------------------------|-----------------|---|--|
| 301 | በጤና ተቋማት ውስጥ የባክቴሪያ መዛመትና መሰራጨት በብዛት የሚከሰተው በጤና ባለሙያዎች የተበከለ እጅ ነው | [ ] እጥብቁ እሰማማለሁ | 5 |  |
|     |                                                                    | [ ] እሰማማለሁ      | 4 |  |
|     |                                                                    | [ ] አላውቅም       | 3 |  |
|     |                                                                    | [ ] አልሰማማም      | 2 |  |
|     |                                                                    | [ ] እጥብቁ አልሰማማም | 1 |  |
| 302 | የግል መከላከያ (PPE) ስራዬን ፈታኝና አታካች አያደርጉብኝም                            | [ ] እጥብቁ እሰማማለሁ | 5 |  |
|     |                                                                    | [ ] እሰማማለሁ      | 4 |  |
|     |                                                                    | [ ] አላውቅም       | 3 |  |
|     |                                                                    | [ ] አልሰማማም      | 2 |  |

|     |                                                                                                       |                |   |  |
|-----|-------------------------------------------------------------------------------------------------------|----------------|---|--|
|     |                                                                                                       | [ ] እጥብቁአልሰማማም | 1 |  |
| 303 | እጅ መታጠብ ዋነኛው (ግምባቀደም) የ IP መከላከያ መንገድ ነው።                                                             | [ ] እጥብቁአልሰማማም | 5 |  |
|     |                                                                                                       | [ ] እሰማማለሁ     | 4 |  |
|     |                                                                                                       | [ ] አላውቅም      | 3 |  |
|     |                                                                                                       | [ ] አልሰማማም     | 2 |  |
|     |                                                                                                       | [ ] እጥብቁአልሰማማም | 1 |  |
| 304 | ተገቢ ያልሆነ (ደካማ) የማከም ስራ (disinfection) በጤና ባለሙያዎችና በታካሚዎች ላይ የሚከሰተውን ኢንፌክሽን (HCA) በከፍተኛ ሁኔታ ሊጨምር ይችላል። | [ ] እጥብቁአልሰማማም | 5 |  |
|     |                                                                                                       | [ ] እሰማማለሁ     | 4 |  |
|     |                                                                                                       | [ ] አላውቅም      | 3 |  |
|     |                                                                                                       | [ ] አልሰማማም     | 2 |  |
|     |                                                                                                       | [ ] እጥብቁአልሰማማም | 1 |  |
| 305 | ማንኛውም ሰው የጤና ባለሙያና ታካሚን ጨምሮ ለበሽታ መተላለፊያ መንገድ ሊሆኑ ይችላሉ ብሎ ማሰብ የ IP መሰረታዊ መርህ ነው።                       | [ ] እጥብቁአልሰማማም | 5 |  |
|     |                                                                                                       | [ ] እሰማማለሁ     | 4 |  |
|     |                                                                                                       | [ ] አላውቅም      | 3 |  |
|     |                                                                                                       | [ ] አልሰማማም     | 2 |  |
|     |                                                                                                       | [ ] እጥብቁአልሰማማም | 1 |  |
| 306 | መርፌን መክደን አስፈላጊ ከሆነ መክደን ያለበት በአንድ እጅ ብቻ ነው                                                           | [ ] እጥብቁአልሰማማም | 5 |  |
|     |                                                                                                       | [ ] እሰማማለሁ     | 4 |  |
|     |                                                                                                       | [ ] አላውቅም      | 3 |  |
|     |                                                                                                       | [ ] አልሰማማም     | 2 |  |
|     |                                                                                                       | [ ] እጥብቁአልሰማማም | 1 |  |
| 307 | በመተላለፍ ደረጃ ውስጥ ያለ ቲቢ ከታካሚው ጋር አዋርን መለዋወጥ ለቲቢ በሽታ ሊያጋልጥ ይችላል።                                          | [ ] እጥብቁአልሰማማም | 5 |  |
|     |                                                                                                       | [ ] እሰማማለሁ     | 4 |  |
|     |                                                                                                       | [ ] አላውቅም      | 3 |  |
|     |                                                                                                       | [ ] አልሰማማም     | 2 |  |
|     |                                                                                                       | [ ] እጥብቁአልሰማማም | 1 |  |
| 308 | ጓጉት ሙሉ በሙሉ አስተማማኝ ጥበቃ ለእጃችን ስለማያደርግ ጓጉትን ካወለቁ በኋላ እጅን መታጠብ እጅግ አስፈላጊ ነው።                              | [ ] እጥብቁአልሰማማም | 5 |  |
|     |                                                                                                       | [ ] እሰማማለሁ     | 4 |  |
|     |                                                                                                       | [ ] አላውቅም      | 3 |  |
|     |                                                                                                       | [ ] አልሰማማም     | 2 |  |
|     |                                                                                                       | [ ] እጥብቁአልሰማማም | 1 |  |
| 309 | ተገቢ የሆነ የ IP መርሆችን በጤና ተቋማት ካልተተገበሩ የጤና ተቋማት የተላላፊ በሽታና ለወረርሽን ስርጭት መንስኤ ይሆናሉ                         | [ ] እጥብቁአልሰማማም | 5 |  |
|     |                                                                                                       | [ ] እሰማማለሁ     | 4 |  |
|     |                                                                                                       | [ ] አላውቅም      | 3 |  |
|     |                                                                                                       | [ ] አልሰማማም     | 2 |  |
|     |                                                                                                       | [ ] እጥብቁአልሰማማም | 1 |  |
| 310 | ከጤና ተቋማት የሚወጡትን ቆሻሻዎች መለያየት የፅዳት ሰራተኞች የስራ ድርሻ አይደለም                                                  | [ ] እጥብቁአልሰማማም | 5 |  |
|     |                                                                                                       | [ ] እሰማማለሁ     | 4 |  |
|     |                                                                                                       | [ ] አላውቅም      | 3 |  |
|     |                                                                                                       | [ ] አልሰማማም     | 2 |  |
|     |                                                                                                       | [ ] እጥብቁአልሰማማም | 1 |  |
| 311 | ለ (critical) ሰርጂካል እና ሜዲካላል እቃዎችን ከጀርም ነፃ ለማድረግ ስትራቴጂክን ዘዴ ከዲስኢንፌክሽን ዘዴ የተሻለ ተመራጭ ነው                  | [ ] እጥብቁአልሰማማም | 5 |  |
|     |                                                                                                       | [ ] እሰማማለሁ     | 4 |  |
|     |                                                                                                       | [ ] አላውቅም      | 3 |  |

|     |                                                                                                                                              |                 |   |  |
|-----|----------------------------------------------------------------------------------------------------------------------------------------------|-----------------|---|--|
|     |                                                                                                                                              | [ ] አልሰማማም      | 2 |  |
|     |                                                                                                                                              | [ ] እጥብቄአልሰማማም  | 1 |  |
| 312 | ለጀርባቸው ተላላፊ የመንገድ ሊሆን ይችላል።<br>Non-critical ሰርጂካል እና ሜዲካል እቃዎችን በሚገባ<br>ካልታከሙ ለበሽታ መተላለፍ (hospital acquired infection)<br>ትልቅ ድርሻ ሊጨውቱ ይችላሉ። | [ ] እጥብቄአልሰማማለሁ | 5 |  |
|     |                                                                                                                                              | [ ] አልሰማማለሁ     | 4 |  |
|     |                                                                                                                                              | [ ] አላውቅም       | 3 |  |
|     |                                                                                                                                              | [ ] አልሰማማም      | 2 |  |
|     |                                                                                                                                              | [ ] እጥብቄአልሰማማም  | 1 |  |

**ክፍል አራት:- የጤና ባለሙያዎችን የ IP እውቀት የተመለከቱ መጠይቆች**

| ተ.ቁ | መጠይቅ                                                                                                                       | ምላሽ                                                                      | ብድር |             |
|-----|----------------------------------------------------------------------------------------------------------------------------|--------------------------------------------------------------------------|-----|-------------|
| 401 | የጤና ተቋማት ውስጥ ስለሚከሰቱ በሽታዎች<br>(health care associated infections) ያውቃሉ?                                                     | [ ] አዎ                                                                   | 1   |             |
|     |                                                                                                                            | [ ] አይ                                                                   | 2   | Skip to 407 |
| 402 | በጤና ተቋማት ውስጥ የሚከሰት በሽታ<br>(HCAI) ማለት አንድ ሰው ለመታከም<br>ከመጣበት በሽታ ተጨማሪ (ሌላ) በሽታከ48<br>ሰዓት ቆይታ በኋላ ሲያጋጥመው የሚከሰት<br>በሽታን ያመለክታል | [ ] አዎ                                                                   | 1   |             |
|     |                                                                                                                            | [ ] አይ                                                                   | 2   |             |
| 403 | በጤና ተቋማት ውስጥ የሚከሰቱ ማናኛውም<br>በሽታዎች (HCAI) በቀላሉ እና ብዙ ወጪ<br>በሚያስወጣ መንገድ መከላከል ይቻላል                                           | [ ] አዎ                                                                   | 1   |             |
|     |                                                                                                                            | [ ] አይ                                                                   | 2   |             |
| 404 | በጤና ተቋማት ውስጥ የሚከሰት በሽታ<br>(HCAI) እንዴት ይተላለፋል? (ከአንድ በላይ<br>መምረጥ ይቻላሉ)                                                      | [ ] በደምና ከሰውነት በሚወጣ<br>ፈሣሽ ንክኪ                                           | 1   |             |
|     |                                                                                                                            | [ ] በተበከለ መርፌና ስለታም<br>እቃዎች                                              | 2   |             |
|     |                                                                                                                            | [ ] በአየር /በትንፋሽ/                                                         | 3   |             |
|     |                                                                                                                            | [ ] በተበከለ እጅ                                                             | 4   |             |
| 405 | በጤና ተቋማት ውስጥ የሚከሰቱ በሽታዎች<br>(HCAI) በብዛት የሚከሰቱት የትኞቹ ናቸው?<br>(ከአንድ በላይ መምረጥ ይቻላል)                                           | [ ] ከቀዶ ጥገና በኋላ የሚከሰት<br>እንጨክሽን (Surgical sit<br>infection)              | 1   |             |
|     |                                                                                                                            | [ ] የሽንት ቧንቧ ኢንፌክሽን<br>(Urinary tract infections)                        | 2   |             |
|     |                                                                                                                            | [ ] የላይኛው የመተንፈሻ አካላት<br>ኢንፌክሽን (Respiratory<br>infections)              | 3   |             |
|     |                                                                                                                            | [ ] በደም ቧንቧዎች እና በደም<br>ላይ የሚከሰቱ ኢንፌክሽኖች<br>(Infections of blood stream) | 4   |             |
| 406 | በጤና ተቋማት ውስጥ የሚከሰቱ በሽታዎችን<br>(HCAI) እንዴት እንከላከላለን (ከአንድ በላይ<br>መምረጥ ይቻላል)                                                  | [ ] እጅን መታጠብ                                                             | 1   |             |
|     |                                                                                                                            | [ ] ቆሻሻዎችን በአግባቡ ማስወገድ<br>(Proper HCWM)                                  | 2   |             |
|     |                                                                                                                            | [ ] የህክምና መገልገያ እቃዎች<br>በተገቢው ማፅዳት                                       | 3   |             |

|     |                                                  |                                                                                                                                                         |   |  |
|-----|--------------------------------------------------|---------------------------------------------------------------------------------------------------------------------------------------------------------|---|--|
|     |                                                  | <input type="checkbox"/> ጥንቃቄ የተሞላበት መርፌ መስጠት                                                                                                           | 4 |  |
|     |                                                  | <input type="checkbox"/> የግል መከላከያ ዘዴዎችን (PPE) ባግባቡ መጠቀም                                                                                                | 5 |  |
|     |                                                  | <input type="checkbox"/> አደገኛ በሆነ ተላላፊ በሽታ የተጠቁ ሰዎችላ ብቻ ማስተኛት                                                                                           | 6 |  |
| 407 | የ IP ዋና መርሆች የሆኑት የትኞቹ ናቸው? (ከአንድ በላይ መምረጥ ይቻላል) | <input type="checkbox"/> የህክምና መገልገያ እቃዎችን ማጽዳትና ማከም                                                                                                    | 1 |  |
|     |                                                  | <input type="checkbox"/> ከጤና ተቋማት የሚወጡትን አደገኛ ቆሻሻችን በአግባቡ ማስወገድ                                                                                         | 2 |  |
|     |                                                  | <input type="checkbox"/> የግል መከላከያ ዘዴዎችን (PPE) መጠቀም                                                                                                     | 3 |  |
|     |                                                  | <input type="checkbox"/> ደህንነቱ የተጠበቀ አስተማማኝ የቀዶ ጥገና አገልግሎት መስጠት እና ደህንነቱን በጠበቀ ሁኔታ መድሀኒቶችን ለታካሚዎች መስጠት (Safe surgical procedures and medication safety) | 4 |  |
|     |                                                  | <input type="checkbox"/> እጅን መታጠብ                                                                                                                       | 5 |  |
|     |                                                  | <input type="checkbox"/> አስተማማኝነቱ የተጠበቀ መርፌ ለታካሚዎች መስጠት                                                                                                 | 6 |  |
|     |                                                  | <input type="checkbox"/> ከአደጋ በሁዋላ የሚወሰዱ የድንገተኛ መድሀኒቶች አቅርቦት አገልግሎት (PPE)                                                                               | 7 |  |
| 408 | IP ስራዎችን ከባድ ያደርገዋል (አስቸጋሪ ያደርገዋል)               | <input type="checkbox"/> አዎ                                                                                                                             | 1 |  |
|     |                                                  | <input type="checkbox"/> አይ                                                                                                                             | 2 |  |

| <b>የእጅ ንፅህና መጠይቅ</b> |                                                                                             |                             |   |  |
|----------------------|---------------------------------------------------------------------------------------------|-----------------------------|---|--|
| 409                  | እጅን መታጠብ ዋናውና ቀዳሚው የIP መርሆ ነው።                                                              | <input type="checkbox"/> አዎ | 1 |  |
|                      |                                                                                             | <input type="checkbox"/> አይ | 2 |  |
| 410                  | <b>እጅን መታጠብ (Hand washing) የተሞላከቱ መጠይቅ</b>                                                  |                             |   |  |
|                      | 410.1 እጅን መታጠብ ዳንት ከማድረግ በፊትና ዳንት ከማድረግ በኋላ ሊተገበር ይገባል                                      | <input type="checkbox"/> አዎ | 1 |  |
|                      |                                                                                             | <input type="checkbox"/> አይ | 2 |  |
|                      | 410.2 ማንኛውንም በሽተኛ ከመንከቶ በፊትና በሁዋላ እጅን በሰሙናና በውሀ መታጠብ አስፈላጊ ነው።                              | <input type="checkbox"/> አዎ | 1 |  |
|                      |                                                                                             | <input type="checkbox"/> አይ | 2 |  |
| 411                  | <b>አንድሴብቲክ የተሞላከቱ መጠይቅ</b>                                                                  |                             |   |  |
|                      | 411.1 ከፍተኛ ተጋላጭነት ያላቸውን ታካሚዎች ከማከማችን በፊት እጃችንን በአንድሴብቲክ (hand antiseptics) ሰሙና መታጠብ ይኖርብናል። | <input type="checkbox"/> አዎ | 1 |  |
|                      |                                                                                             | <input type="checkbox"/> አይ | 2 |  |
|                      | 411.2 በአልኮል የተዘጋጀ አንድሴብቲክ                                                                   | <input type="checkbox"/> አዎ | 1 |  |

|     |                                                                                                          |                             |   |  |
|-----|----------------------------------------------------------------------------------------------------------|-----------------------------|---|--|
|     | antiseptic hand rub) ከተጠቀምን በሁዋላ እጃችን መታጠብ አይኖርብንም                                                       | <input type="checkbox"/> አይ | 2 |  |
|     | 411.3 እጃችን እስካልቆሸሽ ጊዜ ድረስ አንቲ ሴብቲክን መጠቀም እጅን በውሀና በሰሙና ከመታጠብ ጋር እኩል አስተዋጽዖ አለው።                          | <input type="checkbox"/> አዎ | 1 |  |
|     |                                                                                                          | <input type="checkbox"/> አይ | 2 |  |
| 412 | የእጅ መታጠቢያ ሲንክ በስራዎ አቅራቢያ ይገኛል?                                                                           | <input type="checkbox"/> አዎ | 1 |  |
|     |                                                                                                          | <input type="checkbox"/> አይ | 2 |  |
| 413 | በስራ ቦታዎ የማይቋረጥ የውሀ ዘቅርቦት አለ?                                                                             | <input type="checkbox"/> አዎ | 1 |  |
|     |                                                                                                          | <input type="checkbox"/> አይ | 2 |  |
| 414 | <b>የግል መከላከያ እቃዎች (PPE) የተመለከቱ መጠይቅ</b>                                                                  |                             |   |  |
|     | 414.1 መርፌ ለታካሚ በምንአጥብት ጊዜ ጓንት ማድረግ አያስፈልገንም                                                              | <input type="checkbox"/> አዎ | 1 |  |
|     |                                                                                                          | <input type="checkbox"/> አይ | 2 |  |
|     | 414.2 ድንገተኛ የሆነ የመፈንጠር ወይም የመረጨት አደጋ ሊያሰከትል የሚችል ስራ በምንከናወንበት ጊዜ ሽርጥን መሰብሰብ አስፈላጊ ነው።                    | <input type="checkbox"/> አዎ | 1 |  |
|     |                                                                                                          | <input type="checkbox"/> አይ | 2 |  |
|     | 414.3 የመረጨት አደጋ በአይናችን ላይ ሊያሰከትል የሚችል ስራ በምንሰራበት ጊዜ የአይን መንፀር ማድረግ ተገቢ ነው።                               | <input type="checkbox"/> አዎ | 1 |  |
|     |                                                                                                          | <input type="checkbox"/> አይ | 2 |  |
|     | 414.4 ሰርጂክል የአፍንጫ መሸፈኛ የTB በሽታን አይከላከልም                                                                  | <input type="checkbox"/> አዎ | 1 |  |
|     |                                                                                                          | <input type="checkbox"/> አይ | 2 |  |
| 415 | ከጤና ተቋምዎ በሚሰጡት የግል መከላከያ እቃዎች (PPE) አቅርቦት ደስተኛ ናት?                                                       | <input type="checkbox"/> አዎ | 1 |  |
|     |                                                                                                          | <input type="checkbox"/> አይ | 2 |  |
|     | <b>Post Exposure Prophylaxis (PEP) የተመለከቱ መጠይቅ</b>                                                       |                             |   |  |
| 416 | <b>የጤና ባለሙያዎ Post -exposure prophylaxis (PEP) እውቀት የተመለከቱ መጠይቅ</b>                                       |                             |   |  |
|     | 425.1 PEP ከሁለት ሰዓት በፊት መውሰድ የተከሰተውን አደጋ ለማስቀረት ተመራጭ ነው                                                   | <input type="checkbox"/> አዎ | 1 |  |
|     |                                                                                                          | <input type="checkbox"/> አይ | 2 |  |
|     | 425.2 PEP ከ72 ሰዓት በኋላ መውሰድ እምብዛም ጥቅም አይኖረውም                                                              | <input type="checkbox"/> አዎ | 1 |  |
|     |                                                                                                          | <input type="checkbox"/> አይ | 2 |  |
|     | 425.3 PEP የሚሰጠው ለ28 ቀናት ነው።                                                                              | <input type="checkbox"/> አዎ | 1 |  |
|     |                                                                                                          | <input type="checkbox"/> አይ | 2 |  |
|     | <b>TB infection control የተመለከቱ መጠይቅ</b>                                                                  |                             |   |  |
| 417 | <b>TB-IC እውቀት የተመለከቱ መጠይቅ</b>                                                                            |                             |   |  |
|     | 417.1 በ BCG የተከተቡ ሰዎች በ TB ፈፅሞ ሊጠቁ አይችሉም                                                                 | <input type="checkbox"/> አዎ | 1 |  |
|     |                                                                                                          | <input type="checkbox"/> አይ | 2 |  |
|     | 417.2 በጤና ተቋም ውስጥ የሚያስሉና የሚያስነጥሱ ታካሚዎችን ባፋጣኝ እርዳታ በመስጠት በጤና ተቋማት ውስጥ የሚወደቡን ጊዜ ማሳጠር የጤና ባለሙያዎች ሀላፊነት ነው። | <input type="checkbox"/> አዎ | 1 |  |
|     |                                                                                                          | <input type="checkbox"/> አይ | 2 |  |
|     | <b>ሴፍ ኢንጂክሽን (Safe injection) በተመለከተ</b>                                                                 |                             |   |  |
| 418 | <b>የ Safe injection እውቀት የተመለከቱ መጠይቅ</b>                                                                 |                             |   |  |
|     | 418.1 ሴፍኢንጂክሽን ማለት ስንል ታካሚውንና የጤና ባለሙያውን ከአደጋ የጠበቀ እና የማይጎዳ ብሎም አግባብነት ያለውን የአወጋገድ ስርአት                  | <input type="checkbox"/> አዎ | 1 |  |
|     |                                                                                                          | <input type="checkbox"/> አይ | 2 |  |



|                                                                  |                                                                                                                                 |                             |   |        |
|------------------------------------------------------------------|---------------------------------------------------------------------------------------------------------------------------------|-----------------------------|---|--------|
|                                                                  | የተከተለ ማለታችን ነው።                                                                                                                 |                             |   |        |
|                                                                  | 418.2 መርፌ ከመስጠት በፊት በአንቶሴኮቲክ ቆዳን መጥረግ አስፈላጊ ነው።                                                                                 | <input type="checkbox"/> አዎ | 1 |        |
|                                                                  |                                                                                                                                 | <input type="checkbox"/> አይ | 2 |        |
|                                                                  | 418.3 የተጠቀምንባቸው መርፌዎች በሴፍቲቦክስ ብቻ መጣል ይኖርብናል                                                                                     | <input type="checkbox"/> አዎ | 1 |        |
|                                                                  |                                                                                                                                 | <input type="checkbox"/> አይ | 2 |        |
|                                                                  | 418.4 HBV & HCV ጥንቃቄ በጎደለው መርፌ ሊተላለፍ ይችላል።                                                                                      | <input type="checkbox"/> አዎ | 1 |        |
|                                                                  |                                                                                                                                 | <input type="checkbox"/> አይ | 2 |        |
| <b>የህክምና መገልገያ እቃዎችን ማከም (Instrument Processing) የተመለከቱ መጠይቅ</b> |                                                                                                                                 |                             |   |        |
| 419                                                              | ስለ Spaulding ክፍፍል ሰምተው ያውቃሉ?                                                                                                    | <input type="checkbox"/> አዎ | 1 |        |
|                                                                  |                                                                                                                                 | <input type="checkbox"/> አይ | 2 | ወደ 421 |
| 420                                                              | ከ spaulding ክፍል ውስጥ የሰውነት ውስጠኛውን ክፍል የሚነኩ እቃዎች እና የህክምና አገልግሎቶች ከርቲካል(Critical) በሚባለው ምድብ ውስጥ ይመደባሉ                             | <input type="checkbox"/> አዎ | 1 |        |
|                                                                  |                                                                                                                                 | <input type="checkbox"/> አይ | 2 |        |
| 421                                                              | 0.5% በበረኪና ውህድን ማዘጋጀት ይችላሉ?                                                                                                     | <input type="checkbox"/> አዎ | 1 |        |
|                                                                  |                                                                                                                                 | <input type="checkbox"/> አይ | 2 |        |
| <b>ዲኮንታሚኔሽን (Decontamination)</b>                                |                                                                                                                                 |                             |   |        |
| 422                                                              | <b>የ ዲኮንታሚኔሽን (Decontamination) እውቀት የተመለከቱ መጠይቅ</b>                                                                            |                             |   |        |
|                                                                  | 422.1 ዲኮንታሚኔሽን የህክምና እቃዎችን ለማከም የመጀመሪያው ቀዳሚ ተግባር ነው                                                                             | <input type="checkbox"/> አዎ | 1 |        |
|                                                                  |                                                                                                                                 | <input type="checkbox"/> አይ | 2 |        |
|                                                                  | 422.2 የ decontamination ዋና አላማ የጤና ባለሙያዎችንና አጋር ባልደረቦችን ከድንገተኛ አደጋ መከላከል ነው።                                                    | <input type="checkbox"/> አዎ | 1 |        |
|                                                                  |                                                                                                                                 | <input type="checkbox"/> አይ | 2 |        |
|                                                                  | 422.3 decontamination አደገኛ የሆነ ጀርሞችን HIV HBV እና HCV ፍዝ (inactivate) ያደራጋል ቁጥራቸውንም ይቀንሳል።                                        | <input type="checkbox"/> አዎ | 1 |        |
|                                                                  |                                                                                                                                 | <input type="checkbox"/> አይ | 2 |        |
|                                                                  | 422.4 በ0.5% በበረኪና ውህድ ውስጥ ለ10 ደቂቃ እቃዎችን መዘፍዘፍ Decontamination እንዲፈጠር ያደርጋል።                                                     | <input type="checkbox"/> አዎ | 1 |        |
|                                                                  |                                                                                                                                 | <input type="checkbox"/> አይ | 2 |        |
| <b>የዲስኢንፌክሽን (Disinfection) እውቀት የተመለከቱ መጠይቅ</b>                 |                                                                                                                                 |                             |   |        |
| 423                                                              | <b>የDisinfection እውቀት የተመለከቱ መጠይቅ</b>                                                                                           |                             |   |        |
|                                                                  | 423.1 Disinfection ሁሉንም ጀርሞች የባክቴሪያ እስፕሮን (spores) ጨምሮ ሁሉንም ፈፅሞ ይገላል።                                                           | <input type="checkbox"/> አዎ | 1 |        |
|                                                                  |                                                                                                                                 | <input type="checkbox"/> አይ | 2 |        |
|                                                                  | 423.2 ከ Decontamination እና ከማፅዳት በሁለቱም የህክምና መገልገያ እቃዎችን በ0.1% የበረኪና ውህድ ውስጥ ለ 20 ደቂቃ መዘፍዘፍ high level disinfection (HLD) ይሰጠናል | <input type="checkbox"/> አዎ | 1 |        |
|                                                                  |                                                                                                                                 | <input type="checkbox"/> አይ | 2 |        |
| <b>የአስቴራይሊዜሽን (Sterilization) የተመለከቱ መጠይቅ</b>                    |                                                                                                                                 |                             |   |        |
| 424                                                              | <b>የsterilization እውቀት የተመለከቱ መጠይቅ</b>                                                                                          |                             |   |        |
|                                                                  | 424.1 sterilization ሁሉን ምጀርሞች የባክቴሪያ እስፕሮን (spores) ጨምሮ ሁሉንም አረቂቅ ተዋሲያን ፈፅሞ ይገላል።                                               | <input type="checkbox"/> አዎ | 1 |        |
|                                                                  |                                                                                                                                 | <input type="checkbox"/> አይ | 2 |        |
|                                                                  | 424.2 የሰርቺካል እቃዎችን ከጀርም ነፃ ለማድረግ                                                                                                | <input type="checkbox"/> አዎ | 1 |        |

|                                                            |                                                                                                                                |                             |   |  |
|------------------------------------------------------------|--------------------------------------------------------------------------------------------------------------------------------|-----------------------------|---|--|
|                                                            | steam sterilization ተመራጭ መንገድ ነው።                                                                                              | <input type="checkbox"/> አይ | 2 |  |
|                                                            | 424.3 Sterilization በእንፋሎት (high-pressure steam) በደረቅ ሙቀት (dry heat) እና በኬሚካሎች (Glutaraldehyde and Formaldehyde) መተግበር እንችላለን። | <input type="checkbox"/> አዎ | 1 |  |
|                                                            |                                                                                                                                | <input type="checkbox"/> አይ | 2 |  |
| <b>ከህክምና አገልግሎት የሚወጡትን ቆሻሻዎች አወጋገድን (HCWM) የተመለከቱ መጠይቅ</b> |                                                                                                                                |                             |   |  |
| 425                                                        | <b>ከህክምና አገልግሎት የሚወጡትን ቆሻሻዎች የተመለከቱ መጠይቅ</b>                                                                                   |                             |   |  |
|                                                            | 425.1 ሴፍቲቲቦክስ (safety box) ¾ ሲሞላ መዘጋት እና መጣል ይኖርበታል።                                                                           | <input type="checkbox"/> አዎ | 1 |  |
|                                                            |                                                                                                                                | <input type="checkbox"/> አይ | 2 |  |
|                                                            | 425.2 ከህክምና አገልግሎት የሚወጡትን ቆሻሻዎች (Health care wastes) በአግባቡ መለያየት (segregation) የአምራች (generator) ሀላፊነት ነው።                     | <input type="checkbox"/> አዎ | 1 |  |
|                                                            |                                                                                                                                | <input type="checkbox"/> አይ | 2 |  |
|                                                            | 425.3 ከህክምና አገልግሎት የሚወጡትን አደገኛ ቆሻሻዎች መለያያ እና መጣያ 3 ባልደዎች አሉ (for general, infectious and sharp wastes)                         | <input type="checkbox"/> አዎ | 1 |  |
|                                                            |                                                                                                                                | <input type="checkbox"/> አይ | 2 |  |

**“ግዜዎትን ሰውተው ለሰጡት መልስ ክልብ አመሰግናለሁ!!!”**
