# Supplementary material for: Stethoscope disinfection is rarely done in Ethiopia: What are the associated factors?
Source: PubMed Central journal article supplement (PMC6597050; doi:10.1371/journal.pone.0208365), 2019-06-27
Supplement: pone.0208365.s002.pdf [file pone.0208365.s002.pdf]

**PART ONE: 1.1 SOCIO-DEMOGRAPHIC DATA (Please, thick on the space provided)**

| 1.1 SOCIO DEMOGRAPHIC DATA |                                             |                                                                  |      |              |
|----------------------------|---------------------------------------------|------------------------------------------------------------------|------|--------------|
| S.No                       | Item/Questions                              | Response option                                                  | Code | Skip pattern |
| 101                        | Level of Health Institution                 | <input type="checkbox"/> Referral hospital                       | 1    |              |
|                            |                                             | <input type="checkbox"/> General /zonal/hospital                 | 2    |              |
|                            |                                             | <input type="checkbox"/> Health center                           | 3    |              |
| 102                        | Current working Department                  | <input type="checkbox"/> OPD , E-OPD and Triage                  | 1    |              |
|                            |                                             | <input type="checkbox"/> Inpatient clinic                        | 2    |              |
|                            |                                             | <input type="checkbox"/> Medical and Surgical                    | 3    |              |
|                            |                                             | <input type="checkbox"/> Pediatrics                              | 4    |              |
|                            |                                             | <input type="checkbox"/> Maternity, Obstetrics and Delivery room | 5    |              |
|                            |                                             | <input type="checkbox"/> OR and Minor-OR                         | 6    |              |
|                            |                                             | <input type="checkbox"/> Laboratory                              | 7    |              |
|                            |                                             | <input type="checkbox"/> Other (specify)                         | 8    |              |
| 103                        | Sex ( do not ask)                           | <input type="checkbox"/> Male                                    | 1    |              |
|                            |                                             | <input type="checkbox"/> Female                                  | 2    |              |
| 104                        | What is your Profession?                    | <input type="checkbox"/> Doctor                                  | 1    |              |
|                            |                                             | <input type="checkbox"/> Nurse/Midwife                           | 2    |              |
|                            |                                             | <input type="checkbox"/> Health officer                          | 3    |              |
|                            |                                             | <input type="checkbox"/> Lab technicians                         | 4    |              |
|                            |                                             | <input type="checkbox"/> Other (specify)                         | 5    |              |
| 105                        | What is your Educational status?            | <input type="checkbox"/> Diploma                                 | 1    |              |
|                            |                                             | <input type="checkbox"/> 1 <sup>st</sup> degree                  | 2    |              |
|                            |                                             | <input type="checkbox"/> 2 <sup>nd</sup> degree and above        | 3    |              |
| 106                        | What is your current age?                   | (        ) years                                                 |      |              |
| 107                        | Years of service after the last graduation? | (        ) years                                                 |      |              |
| 108                        | What is your Marital status?                | <input type="checkbox"/> Single                                  | 1    |              |
|                            |                                             | <input type="checkbox"/> Married                                 | 2    |              |
|                            |                                             | <input type="checkbox"/> Divorce/ separated                      | 3    |              |
|                            |                                             | <input type="checkbox"/> Widowed                                 | 4    |              |

**PART ONE: - 1.2 GENERAL INFORMATION ON IP AND SP**

| 1.2 GENERAL INFORMATION ON IP AND SP |                                                                                                               |                              |      |              |
|--------------------------------------|---------------------------------------------------------------------------------------------------------------|------------------------------|------|--------------|
| S.No                                 | Item/Questions                                                                                                | Response option              | Code | Skip pattern |
| 109                                  | <i>Have you ever participated in any training program about infection prevention or standard precautions?</i> | <input type="checkbox"/> Yes | 1    |              |
|                                      |                                                                                                               | <input type="checkbox"/> No  | 2    |              |
| 113                                  | <i>Have you any information on IP and patient safety guideline of Ethiopia?</i>                               | <input type="checkbox"/> Yes | 1    |              |
|                                      |                                                                                                               | <input type="checkbox"/> No  | 2    |              |
| 114                                  | <i>IP committee in your facility?</i>                                                                         | <input type="checkbox"/> Yes | 1    |              |
|                                      |                                                                                                               | <input type="checkbox"/> No  | 2    |              |
| 115                                  | <i>For how many patients do you provide service (care) per day?</i>                                           | (    ) number                |      |              |
| 116                                  | <i>Is there SOP, Guideline or poster that describe Infection</i>                                              | <input type="checkbox"/> Yes | 1    |              |

**PART ONE: 1.3:- HCWS STETHOSCOPE DISINFECTION PRACTICE AND RELATED QUESTIONS**

| S.no  | Item/Questions                                                                           | Response option              | Code | Skip pattern |
|-------|------------------------------------------------------------------------------------------|------------------------------|------|--------------|
|       | <b>Stethoscope disinfection characteristics</b>                                          |                              |      |              |
| 117   | Do you disinfect your stethoscope?                                                       |                              |      |              |
| 117.1 | Yes "after every use?"                                                                   | <input type="checkbox"/> Yes | 1    |              |
|       |                                                                                          | <input type="checkbox"/> No  | 2    |              |
| 117.2 | Yes "Once a week or less often"                                                          | <input type="checkbox"/> Yes | 1    |              |
|       |                                                                                          | <input type="checkbox"/> No  | 2    |              |
| 117.3 | Yes "One or two a day"                                                                   | <input type="checkbox"/> Yes | 1    |              |
|       |                                                                                          | <input type="checkbox"/> No  | 2    |              |
| 117.4 | Never                                                                                    | <input type="checkbox"/> No  | 1    |              |
| 118   | Do you belief stethoscope contamination can contribute to the transmission of infections | <input type="checkbox"/> Yes | 1    |              |
|       |                                                                                          | <input type="checkbox"/> No  | 2    |              |

**PART TWO: - INFECTION PREVENTION PRACTICES OF HCWS**

*(please select only one response by ticking in the space provided)*

| S.no | Item/Questions                                                                                                                      | Response option                    | Code | Skip pattern |
|------|-------------------------------------------------------------------------------------------------------------------------------------|------------------------------------|------|--------------|
|      | <b>Hand washing</b>                                                                                                                 |                                    |      |              |
| 201  | Do you wash your hand with soap and water at the beginning of each day on arrival and after leaving the work place?                 | <input type="checkbox"/> Always    | 2    |              |
|      |                                                                                                                                     | <input type="checkbox"/> Sometimes | 1    |              |
|      |                                                                                                                                     | <input type="checkbox"/> Never     | 0    |              |
| 202  | Do you wash your hand before any direct contact and after every patient contact?                                                    | <input type="checkbox"/> Always    | 2    |              |
|      |                                                                                                                                     | <input type="checkbox"/> Sometimes | 1    |              |
|      |                                                                                                                                     | <input type="checkbox"/> Never     | 0    |              |
| 203  | Do you wash immediately your hand after accidental contact with blood, body fluid, secretions and contaminated item or instruments? | <input type="checkbox"/> Always    | 2    |              |
|      |                                                                                                                                     | <input type="checkbox"/> Sometimes | 1    |              |
|      |                                                                                                                                     | <input type="checkbox"/> Never     | 0    |              |
| 204  | Do you wash your hand before wearing and after removing sterile or examination gloves?                                              | <input type="checkbox"/> Always    | 2    |              |
|      |                                                                                                                                     | <input type="checkbox"/> Sometimes | 1    |              |
|      |                                                                                                                                     | <input type="checkbox"/> Never     | 0    |              |
|      | <b>Use of glove</b>                                                                                                                 |                                    |      |              |
| 205  | Do you change glove between every patient contact?                                                                                  | <input type="checkbox"/> Always    | 2    |              |
|      |                                                                                                                                     | <input type="checkbox"/> Sometimes | 1    |              |
|      |                                                                                                                                     | <input type="checkbox"/> Never     | 0    |              |
| 206  | Do you change glove between different procedures on the same patient?                                                               | <input type="checkbox"/> Always    | 2    |              |
|      |                                                                                                                                     | <input type="checkbox"/> Sometimes | 1    |              |
|      |                                                                                                                                     | <input type="checkbox"/> Never     | 0    |              |
| 207  | Do you wear Heavy Duty Utility gloves while handling, decontaminating, cleaning or disinfecting contaminated items?                 | <input type="checkbox"/> Always    | 2    |              |
|      |                                                                                                                                     | <input type="checkbox"/> Sometimes | 1    |              |
|      |                                                                                                                                     | <input type="checkbox"/> Never     | 0    |              |
|      | <b>Use of Mask</b>                                                                                                                  |                                    |      |              |
| 208  | Do you wear facemask or face shield when                                                                                            | <input type="checkbox"/> Always    | 2    |              |

|     |                                                                                                                                                                                                      |                                    |   |  |
|-----|------------------------------------------------------------------------------------------------------------------------------------------------------------------------------------------------------|------------------------------------|---|--|
|     | undertaking procedures likely to generate splashes?                                                                                                                                                  | <input type="checkbox"/> Sometimes | 1 |  |
|     |                                                                                                                                                                                                      | <input type="checkbox"/> Never     | 0 |  |
| 209 | Do you wear mask that cover both nose and mouth whenever approaching to TB suspected and confirmed patients?                                                                                         | <input type="checkbox"/> Always    | 2 |  |
|     |                                                                                                                                                                                                      | <input type="checkbox"/> Sometimes | 1 |  |
|     |                                                                                                                                                                                                      | <input type="checkbox"/> Never     | 0 |  |
|     | <b>Gown/apron</b>                                                                                                                                                                                    |                                    |   |  |
| 210 | Do you wear gown or apron during procedures and/or patient care activities when contact of clothing or exposed skin with blood/body fluids, secretions, and excretions is anticipated?               | <input type="checkbox"/> Always    | 2 |  |
|     |                                                                                                                                                                                                      | <input type="checkbox"/> Sometimes | 1 |  |
|     |                                                                                                                                                                                                      | <input type="checkbox"/> Never     | 0 |  |
|     | <b>Goggle or Eyewear</b>                                                                                                                                                                             |                                    |   |  |
| 211 | Do you wear goggle or eye protection during all patient procedures and /or patient care activities likely to generate splashes or sprays of blood, body fluids or secretions into the eye and mouth? | <input type="checkbox"/> Always    | 2 |  |
|     |                                                                                                                                                                                                      | <input type="checkbox"/> Sometimes | 1 |  |
|     |                                                                                                                                                                                                      | <input type="checkbox"/> Never     | 0 |  |
|     | <b>PEP and Occupational injury</b>                                                                                                                                                                   |                                    |   |  |
| 212 | Do you ever consider or believe to starting post exposure prophylaxes (PEP) after a needle stick injury or accidental infectious body fluid splashes on eye, mouth or mucous membranes?              | <input type="checkbox"/> Always    | 2 |  |
|     |                                                                                                                                                                                                      | <input type="checkbox"/> Sometimes | 1 |  |
|     |                                                                                                                                                                                                      | <input type="checkbox"/> Never     | 0 |  |
| 213 | Do you avoid recapping, bending, breaking and hand-manipulating used needles                                                                                                                         | <input type="checkbox"/> Always    | 2 |  |
|     |                                                                                                                                                                                                      | <input type="checkbox"/> Sometimes | 1 |  |
|     |                                                                                                                                                                                                      | <input type="checkbox"/> Never     | 0 |  |
|     | <b>HCWM</b>                                                                                                                                                                                          |                                    |   |  |
| 214 | Do you dispose sharps or needles immediately after use in puncture proof container or safety box?                                                                                                    | <input type="checkbox"/> Always    | 2 |  |
|     |                                                                                                                                                                                                      | <input type="checkbox"/> Sometimes | 1 |  |
|     |                                                                                                                                                                                                      | <input type="checkbox"/> Never     | 0 |  |
| 215 | Do you put sharp object disposal container as close as hand reached places?                                                                                                                          | <input type="checkbox"/> Always    | 2 |  |
|     |                                                                                                                                                                                                      | <input type="checkbox"/> Sometimes | 1 |  |
|     |                                                                                                                                                                                                      | <input type="checkbox"/> Never     | 0 |  |
| 216 | Do Segregation healthcare wastes before disposal in to general, infectious and sharp wastes.                                                                                                         | <input type="checkbox"/> Always    | 2 |  |
|     |                                                                                                                                                                                                      | <input type="checkbox"/> Sometimes | 1 |  |
|     |                                                                                                                                                                                                      | <input type="checkbox"/> Never     | 0 |  |
|     | <b>Instrument processing</b>                                                                                                                                                                         |                                    |   |  |
| 217 | Do you immediately immerse surgical instruments or critical items or any reusable items in decontaminant solution after use?                                                                         | <input type="checkbox"/> Always    | 2 |  |
|     |                                                                                                                                                                                                      | <input type="checkbox"/> Sometimes | 1 |  |
|     |                                                                                                                                                                                                      | <input type="checkbox"/> Never     | 0 |  |
| 218 | Do you wear all PPE (mask, eyewear, apron and heavy duty utility gloves) during instrument processing?                                                                                               | <input type="checkbox"/> Always    | 2 |  |
|     |                                                                                                                                                                                                      | <input type="checkbox"/> Sometimes | 1 |  |
|     |                                                                                                                                                                                                      | <input type="checkbox"/> Never     | 0 |  |
| 219 | Do you perform decontamination before cleaning                                                                                                                                                       | <input type="checkbox"/> Always    | 2 |  |
|     |                                                                                                                                                                                                      | <input type="checkbox"/> Sometimes | 1 |  |
|     |                                                                                                                                                                                                      | <input type="checkbox"/> Never     | 0 |  |
|     | <b>TB infection control and Cough hygiene</b>                                                                                                                                                        |                                    |   |  |
| 220 | Do you Instruct symptomatic persons to cover mouth/nose when sneezing/coughing to use handkerchief and dispose in no-touch receptacle?                                                               | <input type="checkbox"/> Always    | 2 |  |
|     |                                                                                                                                                                                                      | <input type="checkbox"/> Sometimes | 1 |  |
|     |                                                                                                                                                                                                      | <input type="checkbox"/> Never     | 0 |  |

|                                        |                                                                                                                                                                                            |                                    |   |  |
|----------------------------------------|--------------------------------------------------------------------------------------------------------------------------------------------------------------------------------------------|------------------------------------|---|--|
| 221                                    | Do you wear N-95 mask when treating patients with active or suspected pulmonary TB.                                                                                                        | <input type="checkbox"/> Always    | 2 |  |
|                                        |                                                                                                                                                                                            | <input type="checkbox"/> Sometimes | 1 |  |
|                                        |                                                                                                                                                                                            | <input type="checkbox"/> Never     | 0 |  |
| <b>Injection safety</b>                |                                                                                                                                                                                            |                                    |   |  |
| 222                                    | Do you check and verify before administering injection it is given to the right person, the right drug, the right dose, the right time, the right route and the right injection equipment? | <input type="checkbox"/> Always    | 2 |  |
|                                        |                                                                                                                                                                                            | <input type="checkbox"/> Sometimes | 1 |  |
|                                        |                                                                                                                                                                                            | <input type="checkbox"/> Never     | 0 |  |
| 223                                    | Do you use Sterile syringes and sterile needles while administering all medication (Intramuscular, Intravenous and Intradermal) or collect blood from patients?                            | <input type="checkbox"/> Always    | 2 |  |
|                                        |                                                                                                                                                                                            | <input type="checkbox"/> Sometimes | 1 |  |
|                                        |                                                                                                                                                                                            | <input type="checkbox"/> Never     | 0 |  |
| <b>Infection prevention principles</b> |                                                                                                                                                                                            |                                    |   |  |
| 224                                    | Do you follow infection prevention and standard precautions principles in your facility?                                                                                                   | <input type="checkbox"/> Always    | 2 |  |
|                                        |                                                                                                                                                                                            | <input type="checkbox"/> Sometimes | 1 |  |
|                                        |                                                                                                                                                                                            | <input type="checkbox"/> Never     | 0 |  |

**PART THREE: - ATTITUDE OF HCWs TO WARD IP** *(please select only one response by ticking in the space provided best suits among the Likert-scale measurements of your attitude)*

|     |                                                                                                                                                                  |                                            |   |  |
|-----|------------------------------------------------------------------------------------------------------------------------------------------------------------------|--------------------------------------------|---|--|
| 301 | Spreading of bacteria in health facilities mainly occurred via the hands of HCWs                                                                                 | <input type="checkbox"/> Strongly agree    | 5 |  |
|     |                                                                                                                                                                  | <input type="checkbox"/> Agree             | 4 |  |
|     |                                                                                                                                                                  | <input type="checkbox"/> Don't know        | 3 |  |
|     |                                                                                                                                                                  | <input type="checkbox"/> Disagree          | 2 |  |
|     |                                                                                                                                                                  | <input type="checkbox"/> Strongly disagree | 1 |  |
| 302 | PPE does not make work difficult                                                                                                                                 | <input type="checkbox"/> Strongly agree    | 5 |  |
|     |                                                                                                                                                                  | <input type="checkbox"/> Agree             | 4 |  |
|     |                                                                                                                                                                  | <input type="checkbox"/> Don't know        | 3 |  |
|     |                                                                                                                                                                  | <input type="checkbox"/> Disagree          | 2 |  |
|     |                                                                                                                                                                  | <input type="checkbox"/> Strongly disagree | 1 |  |
| 303 | Hand hygiene is the single most important infection prevention procedure.                                                                                        | <input type="checkbox"/> Strongly agree    | 5 |  |
|     |                                                                                                                                                                  | <input type="checkbox"/> Agree             | 4 |  |
|     |                                                                                                                                                                  | <input type="checkbox"/> Don't know        | 3 |  |
|     |                                                                                                                                                                  | <input type="checkbox"/> Disagree          | 2 |  |
|     |                                                                                                                                                                  | <input type="checkbox"/> Strongly disagree | 1 |  |
| 304 | Non appropriate disinfection procedure increase the risk of transmitting of infections or HCAIs among hospitalized patients and HCWs                             | <input type="checkbox"/> Strongly agree    | 5 |  |
|     |                                                                                                                                                                  | <input type="checkbox"/> Agree             | 4 |  |
|     |                                                                                                                                                                  | <input type="checkbox"/> Don't know        | 3 |  |
|     |                                                                                                                                                                  | <input type="checkbox"/> Disagree          | 2 |  |
|     |                                                                                                                                                                  | <input type="checkbox"/> Strongly disagree | 1 |  |
| 305 | Considering Every Person (patient or staff) as a sources means and susceptible for infection transmission is one of the key principles of prevention infections. | <input type="checkbox"/> Strongly agree    | 5 |  |
|     |                                                                                                                                                                  | <input type="checkbox"/> Agree             | 4 |  |
|     |                                                                                                                                                                  | <input type="checkbox"/> Don't know        | 3 |  |
|     |                                                                                                                                                                  | <input type="checkbox"/> Disagree          | 2 |  |
|     |                                                                                                                                                                  | <input type="checkbox"/> Strongly disagree | 1 |  |
| 306 | If needle recapping is necessary it is only performed by using a single handed scoop                                                                             | <input type="checkbox"/> Strongly agree    | 5 |  |
|     |                                                                                                                                                                  | <input type="checkbox"/> Agree             | 4 |  |
|     |                                                                                                                                                                  | <input type="checkbox"/> Don't know        | 3 |  |

|     |                                                                                                                                                         |                                            |   |  |
|-----|---------------------------------------------------------------------------------------------------------------------------------------------------------|--------------------------------------------|---|--|
|     | technique only                                                                                                                                          | <input type="checkbox"/> Disagree          | 2 |  |
|     |                                                                                                                                                         | <input type="checkbox"/> Strongly disagree | 1 |  |
| 307 | Anyone who share air with a person with pulmonary TB in an infectious stage is at risk                                                                  | <input type="checkbox"/> Strongly agree    | 5 |  |
|     |                                                                                                                                                         | <input type="checkbox"/> Agree             | 4 |  |
|     |                                                                                                                                                         | <input type="checkbox"/> Don't know        | 3 |  |
|     |                                                                                                                                                         | <input type="checkbox"/> Disagree          | 2 |  |
|     |                                                                                                                                                         | <input type="checkbox"/> Strongly disagree | 1 |  |
| 308 | Glove does not provide a complete protection and hand washing is necessary after removing gloves                                                        | <input type="checkbox"/> Strongly agree    | 5 |  |
|     |                                                                                                                                                         | <input type="checkbox"/> Agree             | 4 |  |
|     |                                                                                                                                                         | <input type="checkbox"/> Don't know        | 3 |  |
|     |                                                                                                                                                         | <input type="checkbox"/> Disagree          | 2 |  |
|     |                                                                                                                                                         | <input type="checkbox"/> Strongly disagree | 1 |  |
| 309 | In the absence of infection prevention or standard precautions health care facilities can be the source of infection and epidemic diseases              | <input type="checkbox"/> Strongly agree    | 5 |  |
|     |                                                                                                                                                         | <input type="checkbox"/> Agree             | 4 |  |
|     |                                                                                                                                                         | <input type="checkbox"/> Don't know        | 3 |  |
|     |                                                                                                                                                         | <input type="checkbox"/> Disagree          | 2 |  |
|     |                                                                                                                                                         | <input type="checkbox"/> Strongly disagree | 1 |  |
| 310 | Segregation health care wastes at the point of waste generation the duty of waste handlers                                                              | <input type="checkbox"/> Strongly agree    | 5 |  |
|     |                                                                                                                                                         | <input type="checkbox"/> Agree             | 4 |  |
|     |                                                                                                                                                         | <input type="checkbox"/> Don't know        | 3 |  |
|     |                                                                                                                                                         | <input type="checkbox"/> Disagree          | 2 |  |
|     |                                                                                                                                                         | <input type="checkbox"/> Strongly disagree | 1 |  |
| 311 | Sterilization is the preferred method of instrument processing for critical patient care items and devices.                                             | <input type="checkbox"/> Strongly agree    | 5 |  |
|     |                                                                                                                                                         | <input type="checkbox"/> Agree             | 4 |  |
|     |                                                                                                                                                         | <input type="checkbox"/> Don't know        | 3 |  |
|     |                                                                                                                                                         | <input type="checkbox"/> Disagree          | 2 |  |
|     |                                                                                                                                                         | <input type="checkbox"/> Strongly disagree | 1 |  |
| 312 | Non-critical medical and surgical devices when they are not disinfected can play a contributory role in the transmission of hospital acquired infection | <input type="checkbox"/> Strongly agree    | 5 |  |
|     |                                                                                                                                                         | <input type="checkbox"/> Agree             | 4 |  |
|     |                                                                                                                                                         | <input type="checkbox"/> Don't know        | 3 |  |
|     |                                                                                                                                                         | <input type="checkbox"/> Disagree          | 2 |  |
|     |                                                                                                                                                         | <input type="checkbox"/> Strongly disagree | 1 |  |

**PART FOUR: - KNOWLEDGE OF HCWs ON INFECTION PREVENTION (please, thick the response on the space provided)**

| S.No                                          | Item/Questions                                                                                                                                                     | Response option                                       | Code | Skip pattern        |
|-----------------------------------------------|--------------------------------------------------------------------------------------------------------------------------------------------------------------------|-------------------------------------------------------|------|---------------------|
| <b>Health Care Associated Infection(HCAI)</b> |                                                                                                                                                                    |                                                       |      |                     |
| 401                                           | <i>Do you know the standard definition of heard of health care associated infections (HCAIs)?</i>                                                                  | <input type="checkbox"/> Yes                          | 1    | If NO skip to Q 407 |
|                                               |                                                                                                                                                                    | <input type="checkbox"/> No                           | 2    |                     |
| 402                                           | Health-care-associated infection (HCAI) refers to infection that is acquired during the process of care and not manifested at the time of admission to a hospital. | <input type="checkbox"/> Yes                          | 1    |                     |
|                                               |                                                                                                                                                                    | <input type="checkbox"/> No                           | 2    |                     |
| 403                                           | HCAIs can be prevented with readily available, relatively inexpensive strategies                                                                                   | <input type="checkbox"/> Yes                          | 1    |                     |
|                                               |                                                                                                                                                                    | <input type="checkbox"/> No                           | 2    |                     |
| 404                                           | <i>How does HCAIs transmitted (more</i>                                                                                                                            | <input type="checkbox"/> Through blood and body fluid | 1    |                     |

|     |                                                                                                       |                                                                        |   |  |
|-----|-------------------------------------------------------------------------------------------------------|------------------------------------------------------------------------|---|--|
|     | <b>than one answer is possible )</b>                                                                  | contact                                                                |   |  |
|     |                                                                                                       | <input type="checkbox"/> Through contaminated needles and sharps       | 2 |  |
|     |                                                                                                       | <input type="checkbox"/> Through Air droplet                           | 3 |  |
|     |                                                                                                       | <input type="checkbox"/> Through contaminated hands                    | 4 |  |
| 405 | The most frequent HCAs includes                                                                       |                                                                        |   |  |
|     | <b>(more than one answer is possible )</b>                                                            | <input type="checkbox"/> Surgical sit infection                        | 1 |  |
|     |                                                                                                       | <input type="checkbox"/> Urinary tract infections                      | 2 |  |
|     |                                                                                                       | <input type="checkbox"/> Respiratory infections                        | 3 |  |
|     |                                                                                                       | <input type="checkbox"/> Infections of blood stream                    | 4 |  |
| 406 | HCAs can be prevented by applying                                                                     |                                                                        |   |  |
|     | <b>(more than one answer is possible)</b>                                                             | <input type="checkbox"/> Hand Washing                                  | 1 |  |
|     |                                                                                                       | <input type="checkbox"/> Proper HCWM                                   | 2 |  |
|     |                                                                                                       | <input type="checkbox"/> Instrument processing                         | 3 |  |
|     |                                                                                                       | <input type="checkbox"/> Safe injection practices                      | 4 |  |
|     |                                                                                                       | <input type="checkbox"/> Appropriate use of PPE                        | 5 |  |
|     |                                                                                                       | <input type="checkbox"/> Isolation of potentially infectious person    | 6 |  |
| 407 | What does the concept of infection prevention implies?(more than one answer is possible)              | <input type="checkbox"/> Instrument processing                         | 1 |  |
|     |                                                                                                       | <input type="checkbox"/> HCWM                                          | 2 |  |
|     |                                                                                                       | <input type="checkbox"/> use of PPE                                    | 3 |  |
|     |                                                                                                       | <input type="checkbox"/> Safe surgical procedure and medication safety | 4 |  |
|     |                                                                                                       | <input type="checkbox"/> Hand hygiene                                  | 5 |  |
|     |                                                                                                       | <input type="checkbox"/> Safe injection practice                       | 6 |  |
|     |                                                                                                       | <input type="checkbox"/> PEP                                           | 7 |  |
| 408 | Do you think infection prevention make your work harder                                               | <input type="checkbox"/> Yes                                           | 1 |  |
|     |                                                                                                       | <input type="checkbox"/> No                                            | 2 |  |
|     | <b>Hand Hygiene</b>                                                                                   |                                                                        |   |  |
| 409 | Hand hygiene is the single most critical infection prevention procedure                               | <input type="checkbox"/> Yes                                           | 1 |  |
|     |                                                                                                       | <input type="checkbox"/> No                                            | 2 |  |
| 410 | <b>Knowledge on hand washing</b>                                                                      |                                                                        |   |  |
|     | 410.1 Hand washing must be performed before using and after removing sterile or examination gloves    | <input type="checkbox"/> Yes                                           | 1 |  |
|     |                                                                                                       | <input type="checkbox"/> No                                            | 2 |  |
|     | 410.2 Hand washing must be performed before and after coming in direct contact with patient or client | <input type="checkbox"/> Yes                                           | 1 |  |
|     |                                                                                                       | <input type="checkbox"/> No                                            | 2 |  |
| 411 | <b>Knowledge on hand antisepsis and antiseptic hand rub</b>                                           |                                                                        |   |  |
|     | 411.1 Hand antisepsis be applied before examination or caring highly susceptible patients             | <input type="checkbox"/> Yes                                           | 1 |  |
|     |                                                                                                       | <input type="checkbox"/> No                                            | 2 |  |
|     | 411.2 After applying Antiseptic hand-rub it is not necessary to rinse hands with water                | <input type="checkbox"/> Yes                                           | 1 |  |
|     |                                                                                                       | <input type="checkbox"/> No                                            | 2 |  |

|     |                                                                                                                                                                                                  |                              |   |  |
|-----|--------------------------------------------------------------------------------------------------------------------------------------------------------------------------------------------------|------------------------------|---|--|
|     | 411.3 Alcohol-based hand sanitizer was as effective as soap and water when hands were not visibly dirty                                                                                          | <input type="checkbox"/> Yes | 1 |  |
|     |                                                                                                                                                                                                  | <input type="checkbox"/> No  | 2 |  |
| 412 | <i>Does your department (work places) have hand washing facility or sink ?</i>                                                                                                                   | <input type="checkbox"/> Yes | 1 |  |
|     |                                                                                                                                                                                                  | <input type="checkbox"/> No  | 2 |  |
| 413 | <i>Does your department have a continuous running water supply for hand washing</i>                                                                                                              | <input type="checkbox"/> Yes | 1 |  |
|     |                                                                                                                                                                                                  | <input type="checkbox"/> No  | 2 |  |
|     | <b>Personal protective Equipment's</b>                                                                                                                                                           |                              |   |  |
| 414 | <b>Knowledge on use of PPE (Glove, Apron, Goggle and Mask use)</b>                                                                                                                               |                              |   |  |
|     | 414.1 Glove should must be worn while giving injections                                                                                                                                          | <input type="checkbox"/> Yes | 1 |  |
|     |                                                                                                                                                                                                  | <input type="checkbox"/> No  | 2 |  |
|     | 414.2 Aprons or gowns should always wear if the risk of contamination with aggressive procedures and/or activities performed.                                                                    | <input type="checkbox"/> Yes | 1 |  |
|     |                                                                                                                                                                                                  | <input type="checkbox"/> No  | 2 |  |
|     | 414.3 Goggles should be worn when needed to avoid exposure to eyes                                                                                                                               | <input type="checkbox"/> Yes | 1 |  |
|     |                                                                                                                                                                                                  | <input type="checkbox"/> No  | 2 |  |
|     | 414.4 Surgical mask cannot protect the HCWs from being infected by TB                                                                                                                            | <input type="checkbox"/> Yes | 1 |  |
|     |                                                                                                                                                                                                  | <input type="checkbox"/> No  | 2 |  |
| 415 | <i>Do you have the necessary PPE in your department?</i>                                                                                                                                         | <input type="checkbox"/> Yes | 1 |  |
|     |                                                                                                                                                                                                  | <input type="checkbox"/> No  | 2 |  |
|     | <b>Post Exposure Prophylaxis (PEP)</b>                                                                                                                                                           |                              |   |  |
| 416 | <b>Knowledge on Post -exposure prophylaxis (PEP) recommendations</b>                                                                                                                             |                              |   |  |
|     | 416.1 PEP is preferred when initiated within 2 hours of exposure.                                                                                                                                | <input type="checkbox"/> Yes | 1 |  |
|     |                                                                                                                                                                                                  | <input type="checkbox"/> No  | 2 |  |
|     | 416.2 PEP is not effective when initiated after 72 hours of exposure                                                                                                                             | <input type="checkbox"/> Yes | 1 |  |
|     |                                                                                                                                                                                                  | <input type="checkbox"/> No  | 2 |  |
|     | 416.3 The duration of the regimens of Post -exposure prophylaxis (PEP) is 28 days                                                                                                                | <input type="checkbox"/> Yes | 1 |  |
|     |                                                                                                                                                                                                  | <input type="checkbox"/> No  | 2 |  |
|     | <b>TB infection control</b>                                                                                                                                                                      |                              |   |  |
| 417 | <b>Knowledge on TB-IC</b>                                                                                                                                                                        |                              |   |  |
|     | 417.1 People that received BCG vaccination do not develop active TB                                                                                                                              | <input type="checkbox"/> Yes | 1 |  |
|     |                                                                                                                                                                                                  | <input type="checkbox"/> No  | 2 |  |
|     | 417.2 HCWs should be responsible to triage and minimize the time a TB patient spend in health facility                                                                                           | <input type="checkbox"/> Yes | 1 |  |
|     |                                                                                                                                                                                                  | <input type="checkbox"/> No  | 2 |  |
|     | <b>Safe injection</b>                                                                                                                                                                            |                              |   |  |
| 418 | <b>Knowledge on Safe injection</b>                                                                                                                                                               |                              |   |  |
|     | 418.1 Injection safety refers to injections which does not harm the recipient, and does not expose provider to any avoidable risks and does not result waste that is dangerous to the community. | <input type="checkbox"/> Yes | 1 |  |
|     |                                                                                                                                                                                                  | <input type="checkbox"/> No  | 2 |  |

|            |                                                                                                                                       |                              |   |                  |
|------------|---------------------------------------------------------------------------------------------------------------------------------------|------------------------------|---|------------------|
|            | 418.2 Swabbing of clean skin with antiseptic solution prior to giving injection is unnecessary                                        | <input type="checkbox"/> Yes | 1 |                  |
|            |                                                                                                                                       | <input type="checkbox"/> No  | 2 |                  |
|            | 418.3 Used syringes and needles should only discarded in a sharp waste box alone                                                      | <input type="checkbox"/> Yes | 1 |                  |
|            |                                                                                                                                       | <input type="checkbox"/> No  | 2 |                  |
|            | 418.4 HBV and HCV could be transmitted via unsafe injections                                                                          | <input type="checkbox"/> Yes | 1 |                  |
|            |                                                                                                                                       | <input type="checkbox"/> No  | 2 |                  |
|            | <b>INSTRUMENT PROCESSING</b>                                                                                                          |                              |   |                  |
| 419        | <i>Have you ever heard of the Spaulding categories of potential infection risks</i>                                                   | <input type="checkbox"/> Yes | 1 |                  |
|            |                                                                                                                                       | <input type="checkbox"/> No  | 2 | If no go to Q421 |
| 420        | From Spaulding categories items and practices affect mucous membrane and small areas of intact skin consider as critical items        | <input type="checkbox"/> Yes | 1 |                  |
|            |                                                                                                                                       | <input type="checkbox"/> No  | 2 |                  |
| 421        | Do you know how to preparing 0.5% chlorine solution?                                                                                  | <input type="checkbox"/> Yes | 1 |                  |
|            |                                                                                                                                       | <input type="checkbox"/> No  | 2 |                  |
|            | <b>DECONTAMINATION</b>                                                                                                                |                              |   |                  |
| <b>422</b> | <b>Knowledge on decontamination</b>                                                                                                   |                              |   |                  |
|            | 422.1 Decontamination is the first step in instrument processing practices                                                            | <input type="checkbox"/> Yes | 1 |                  |
|            |                                                                                                                                       | <input type="checkbox"/> No  | 2 |                  |
|            | 422.2 The objective of decontamination is to protect HCWs and supportive staffs while handling instruments                            | <input type="checkbox"/> Yes | 1 |                  |
|            |                                                                                                                                       | <input type="checkbox"/> No  | 2 |                  |
|            | 422.3 Decontamination inactivate and reduce the number of HBV,HCV and HIV                                                             | <input type="checkbox"/> Yes | 1 |                  |
|            |                                                                                                                                       | <input type="checkbox"/> No  | 2 |                  |
|            | 422.4 Decontamination achieved by soaking items in 0.5% chlorine solution for 10min                                                   | <input type="checkbox"/> Yes | 1 |                  |
|            |                                                                                                                                       | <input type="checkbox"/> No  | 2 |                  |
|            | <b>DISINFECTION</b>                                                                                                                   |                              |   |                  |
| 423        | Knowledge on disinfection                                                                                                             |                              |   |                  |
|            | 423.1 Disinfection is a process that all the living microorganisms including bacterial spores are killed.                             | <input type="checkbox"/> Yes | 1 |                  |
|            |                                                                                                                                       | <input type="checkbox"/> No  | 2 |                  |
|            | 423.2 After decontamination and cleaning 0.1% chlorine solution for 20 min provide High Level Disinfection (HLD).                     | <input type="checkbox"/> Yes | 1 |                  |
|            |                                                                                                                                       | <input type="checkbox"/> No  | 2 |                  |
|            | <b>STERILIZATION</b>                                                                                                                  |                              |   |                  |
| 424        | Knowledge on sterilization of items                                                                                                   |                              |   |                  |
|            | 424.1 Sterilization is a process where all the living microorganisms, including bacterial spores are killed.                          | <input type="checkbox"/> Yes | 1 |                  |
|            |                                                                                                                                       | <input type="checkbox"/> No  | 2 |                  |
|            | 424.2 Steam sterilization is a preferred method for reusing surgical instruments                                                      | <input type="checkbox"/> Yes | 1 |                  |
|            |                                                                                                                                       | <input type="checkbox"/> No  | 2 |                  |
|            | 424.3 Sterilization can be achieved by high-pressure steam, dry heat, or Chemical sterilants such as Glutaraldehyde and Formaldehyde. | <input type="checkbox"/> Yes | 1 |                  |
|            |                                                                                                                                       | <input type="checkbox"/> No  | 2 |                  |
|            | <b>HCWM</b>                                                                                                                           |                              |   |                  |
| 425        | Knowledge on waste management                                                                                                         |                              |   |                  |



|  |                                                                                                                                              |                              |   |  |
|--|----------------------------------------------------------------------------------------------------------------------------------------------|------------------------------|---|--|
|  | 425.1 Safety boxes should close and sealed when it is ¾ full?                                                                                | <input type="checkbox"/> Yes | 1 |  |
|  |                                                                                                                                              | <input type="checkbox"/> No  | 2 |  |
|  | 425.2 Waste segregation is the responsibility of waste generators                                                                            | <input type="checkbox"/> Yes | 1 |  |
|  |                                                                                                                                              | <input type="checkbox"/> No  | 2 |  |
|  | 425.3 Is there separate (preferred if color coded) and leveled waste collection container available for general, infectious and sharp wastes | <input type="checkbox"/> Yes | 1 |  |
|  |                                                                                                                                              | <input type="checkbox"/> No  | 2 |  |

***Thank you with all the respect.***
