# Supplementary material for: Stethoscope disinfection is rarely done in Ethiopia: What are the associated factors?
Source: PubMed Central journal article supplement (PMC6597050; doi:10.1371/journal.pone.0208365), 2019-06-27
Supplement: pone.0208365.s003.pdf [file pone.0208365.s003.pdf]

**S1 Table: Description of socio-demographic, institutional, and individual related variables included in this analysis.**

| <b>Variable description</b>               | <b>Format for analysis</b>                                                            |
|-------------------------------------------|---------------------------------------------------------------------------------------|
| Socio-demographic characteristic          |                                                                                       |
| Age of healthcare providers (years)       | Categorical variable, reference category was healthcare providers' age above 40 years |
| Sex                                       | Binary, reference category was female sex                                             |
| Profession                                | Categorical variable, reference category was nurses                                   |
| Educational level                         | Binary, reference category was diploma healthcare providers                           |
| Year of service                           | Binary, reference category was above five years work experience                       |
| Healthcare facility related variables     |                                                                                       |
| Training about infection prevention       | Binary, reference category was no history of training about infection prevention      |
| Working department                        | Categorical variable, reference category was OPD, Emergency-OPD and Triage            |
| Availability of SOP in working department | Binary, reference category was no SOP available in working department                 |
| Individual related variables              |                                                                                       |
| Awareness on Ethiopian IPPS guideline     | Binary, reference category was no awareness regarding Ethiopian IPPS guideline        |

|                                                                 |                                                                                  |
|-----------------------------------------------------------------|----------------------------------------------------------------------------------|
| Do you think transmission of infections occurs via stethoscopes | Binary, reference category was no                                                |
| Attitude towards infection prevention                           | Binary, reference category was unfavorable attitude towards infection prevention |
| Knowledge towards preventing HCAs                               | Binary, reference category was not knowledgeable towards preventing HCAs         |
| Self-reported infection prevention practice                     | Binary, reference category was unsafe infection prevention practice              |
