# Supplementary material for: Stethoscope disinfection is rarely done in Ethiopia: What are the associated factors?
Source: PubMed Central journal article supplement (PMC6597050; doi:10.1371/journal.pone.0208365), 2019-06-27
Supplement: pone.0208365.s004.pdf [file pone.0208365.s004.pdf]

**S2 Table: Knowledge, attitude and practice of healthcare providers towards infection prevention and control of healthcare associated infection in healthcare facilities of Addis Ababa, Ethiopia.**

| Study variable                 | N (%)            | Infection prevention Knowledge score |             | Infection prevention attitude score |             | Infection prevention practice score |             |
|--------------------------------|------------------|--------------------------------------|-------------|-------------------------------------|-------------|-------------------------------------|-------------|
|                                |                  | Mean score                           | ± SD        | Mean score                          | ± SD        | Mean score                          | ± SD        |
| <b>Profession</b>              |                  |                                      |             |                                     |             |                                     |             |
| Nurses                         | 372 (68.1)       | 12.31                                | 2.88        | 11.32                               | 1.23        | 14.03                               | 3.39        |
| Health Officer                 | 65 (11.9)        | 12.37                                | 2.52        | 11.31                               | 1.22        | 13.29                               | 3.63        |
| Midwives                       | 51 (9.3)         | 12.80                                | 2.24        | 11.33                               | 1.21        | 14.45                               | 3.08        |
| Physicians                     | 47 (8.6)         | 12.94                                | 1.69        | 11.47                               | 1.12        | 13.94                               | 2.83        |
| Anesthesiologist               | 11 (2.0)         | 12.91                                | 2.50        | 11.55)                              | 0.68        | 14.91                               | 2.42        |
| <b>Overall composite score</b> | <b>546 (100)</b> | <b>12.43</b>                         | <b>2.69</b> | <b>13.99</b>                        | <b>3.33</b> | <b>11.34</b>                        | <b>1.21</b> |
