# Supplementary material for: Stethoscope disinfection is rarely done in Ethiopia: What are the associated factors?
Source: PubMed Central journal article supplement (PMC6597050; doi:10.1371/journal.pone.0208365), 2019-06-27
Supplement: pone.0208365.s005.pdf [file pone.0208365.s005.pdf]

**S3 Table: The association between self reported stethoscope disinfection practices and healthcare providers profession in Addis Ababa, Ethiopia, 2016 (N=546).**

|                                           | Profession                | Nurses | Health officers | Midwives | Physicians | Anesthesiologist | Total  | $X^2$ (df), p-value |
|-------------------------------------------|---------------------------|--------|-----------------|----------|------------|------------------|--------|---------------------|
| <b>Stethoscope disinfection practices</b> | Disinfect after every use | 160    | 25              | 19       | 8          | 5                | 217    | 12.11(4), 0.016     |
|                                           |                           | 73.7%  | 11.5%           | 8.8%     | 3.7%       | 2.3%             | 100.0% |                     |
|                                           | Once a week or less often | 62     | 13              | 3        | 4          | 2                | 84     | 6.84(4), 0.144      |
|                                           |                           | 73.8%  | 15.5%           | 3.6%     | 4.8%       | 2.4%             | 100.0% |                     |
|                                           | One or two a day          | 36     | 5               | 4        | 10         | 1                | 56     | 7.14(4), 0.129      |
|                                           |                           | 64.3%  | 8.9%            | 7.1%     | 17.9%      | 1.8%             | 100.0% |                     |
|                                           | Never                     | 114    | 22              | 25       | 25         | 3                | 189    | 14.71(4), 0.005     |
|                                           |                           | 60.3%  | 11.6%           | 13.2%    | 13.2%      | 1.6%             | 100.0% |                     |

$X^2$ (df) = Chi-square test (degree of freedom)
